# Supplementary material
Source: publisher site journal article supplement (https://www.dovepress.com/get_supplementary_file.php?f=457522.docx)
Supplement: Supplementary file 1 [file get_supplementary_file.php]

**Prevalence and predictors of Intestinal Parasitic Infections at King Abdulaziz University Hospital, Jeddah, Saudi Arabia, from 2019 to 2023: A Retrospective Study**

**Appendix**

| **Age** | ….. years |
| --- | --- |
| **Gender** | ……. |
| **Nationality** | …… |
| **Year of infection** | …… |
| **Presence of coinfection** | …… |
| **Stool color** | …… |
| **Consistency of stool** | …… |
| **Intestinal parasitic species** | …… |

**Data collection form for infected patients:**
